# Supplementary material for: Preferential adsorption of the additive is not a prerequisite for cononsolvency in water-rich mixtures
Source: Royal Society of Chemistry journal article supplement (doi:10.1039/c7cp04384h), 2017-01-01
Supplement: c7cp04384h1.pdf [file c7cp04384h1.pdf]

## Electronic Supplementary Information (ESI)

### Preferential adsorption of the additive is not a prerequisite for cononsolvency in water-rich mixtures

Jian Wang,<sup>ab</sup> Nian Wang,<sup>ab</sup> Biaolan Liu,<sup>ab</sup> Jia Bai,<sup>ab</sup> Pei Gong,<sup>ab</sup> Geyang Ru,<sup>a</sup> and Jiwen Feng<sup>\*a</sup>

<sup>a</sup> State Key Laboratory of Magnetic Resonance and Atomic and Molecular Physics, Wuhan

Institute of Physics and Mathematics, Chinese Academy of Science, Wuhan 430071, P.R. China;

<sup>b</sup> University of Chinese Academy of Science, Beijing 100049, P.R. China

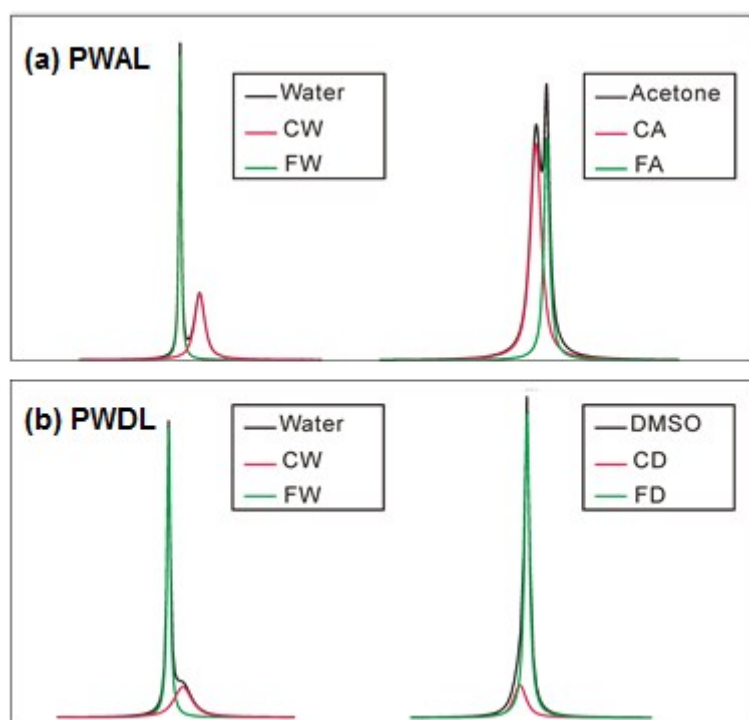

**Figure S1.** Peak fit of free and confined solvents by DMFIT. The confined and free solvents are indicated in red and green, respectively.

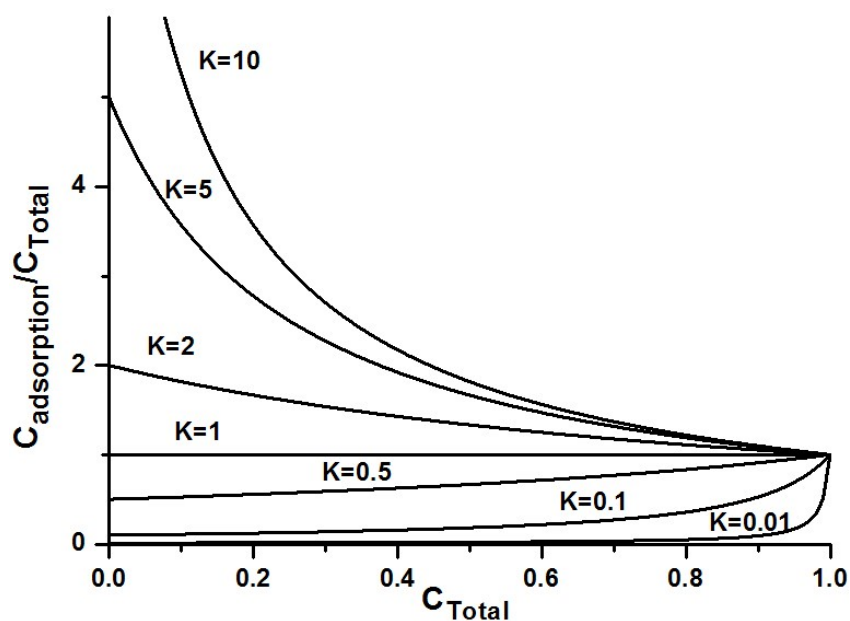

**Figure S2.** Preferential adsorption coefficient  $\eta$  ( $C_{\text{adsorption}}/C_{\text{Total}}$ ) as a function of the total additive concentration. When  $K > 1$ , the value of coefficient  $\eta > 1$  and decreases with the increase of the total additive mole fraction  $C_T$ ; When  $K < 1$ , the value of coefficient  $\eta < 1$  and increases with the increase of the total additive mole fraction  $C_T$ ; When  $K = 1$ ,  $\eta = 1$  and doesn't change with the total concentration.
